# Supplementary material
Source: Research Square preprint supplement (doi:10.21203/rs.3.rs-9131153/v1)
Supplement: Supplementary file 1 [file 4a3832a42f08aef763a3b59b.docx]

Supplementary Table 1 Univariate analysis of factors associated with unfavorable treatment outcome among aPTB

| **Variable** | **Category** | **Treatment outcome [n(%)]** | | ***P*_value** |
| --- | --- | --- | --- | --- |
| **Successful** | **Unfavorable** |
| Sex | Male | 16517 (90.42) | 1750 (9.58) | <0.001 |
| Female | 6859 (91.85) | 609 (8.15) |
| Age group | 65-69 | 8483 (94.17) | 525 (5.83) | <0.001 |
| 70-74 | 6722 (91.89) | 593 (8.11) |
| 75-79 | 4610 (89.67) | 531 (10.33) |
| 80- | 3561 (83.38) | 710 (16.62) |
| Ethnicity | Han ethnicity | 20091(90.73) | 2052 (9.27) | 0.165 |
| Others | 3285(91.45) | 307 (8.55) |
| Household type | Local | 22530(90.86) | 2266 (9.14) | 0.824 |
| Intra-city mobility | 310(89.86) | 35 (10.14) |
| Intra-provincial mobility | 205(89.52) | 24 (10.48) |
| Out-of-province mobility | 331(90.68) | 34 (9.32) |
| Region | Eastern | 6210 (90.39) | 660 (9.61) | <0.001 |
| Central | 9208 (92.13) | 787 (7.87) |
| Western | 7958 (89.72) | 912 (10.28) |
| Diagnosis result | Pathogen negative | 8041 (93.41) | 567 (6.59) | <0.001 |
| Pathogen positive | 13521 (89.18) | 1640 (10.82) |
| No pathogen result | 35 (100.00) | 0 (0.00) |
| Tuberculous pleurisy | 1779 (92.13) | 152 (7.87) |
| Complication | Yes | 5595 (87.48) | 801 (12.52) | <0.001 |
| No | 6667 (92.49) | 541 (7.51) |
| Unknown | 11114 (91.62) | 1017 (8.38) |
| 0-month sputum smear result | Positive | 6141 (87.13) | 907 (12.87) | <0.001 |
| Negative | 17158 (92.22) | 1448 (7.78) |
| No result | 77 (95.06) | 4 (4.94) |
| Discovery mode | Passive | 21577 (90.51) | 2262 (9.49) | <0.001 |
| Active | 1799 (94.88) | 97 (5.12) |
| Treatment type | Initial treatment | 21732 (91.10) | 2122 (8.90) | <0.001 |
| Retreatment treatment | 1644 (87.40) | 237 (12.60) |
| Treatment mode | Outpatient treatment | 21091 (90.69) | 2165 (9.31) | 0.015 |
| Inpatient | 2285 (92.17) | 194 (7.83) |
| Treatment plan | 2HRZE/4HR | 14484 (92.97) | 1096 (7.03) | <0.001 |
| 2HRZE/7-10HRE | 2221 (91.10) | 217 (8.90) |
| 2HRZE/10HRE | 3174 (87.44) | 456 (12.56) |
| 6-9RZELfx | 65 (84.42) | 12 (15.58) |
| Other sensitive plans | 3432 (85.59) | 578 (14.41) |
| Fdc usage | Yes | 18365 (91.62) | 1679 (8.38) | <0.001 |
| No | 5011 (88.05) | 680 (11.95) |
| Medication adherence group | <70% | 39 (7.00) | 518 (93.00) | <0.001 |
| 70%~79% | 12 (26.09) | 34 (73.91) |
| 80%~89% | 21 (33.87) | 41 (66.13) |
| 90%~99% | 661 (84.42) | 122 (15.58) |
| 100% | 22643 (93.23) | 1644 (6.77) |
| Visit adherence group | <70% | 34 (8.04) | 389 (91.96) | <0.001 |
| 70%~79% | 4 (8.89) | 41 (91.11) |
| 80%~89% | 16 (35.56) | 29 (64.44) |
| 90%~99% | 30 (61.22) | 19 (38.78) |
| 100% | 23292 (92.53) | 1881 (7.47) |
| Has first visit | Yes | 23203 (90.93) | 2315 (9.07) | <0.001 |
| No | 173 (79.72) | 44 (20.28) |
| Has adverse reaction | Yes | 229 (56.40) | 177 (43.60) | <0.001 |
| No | 23147 (91.39) | 2182 (8.61) |

Supplementary Table 2 Univariate analysis of factors associated with unfavorable treatment outcome among sPTB

| Variable | Category | Treatment outcome [n(%)] | |  |
| --- | --- | --- | --- | --- |
| Successful | Unfavorable | *P*_value |
| Sex | Male | 122891 (89.53) | 14369 (10.47) | <0.001 |
| Female | 55743 (92.88) | 4276 (7.12) |
| Age group | 65-69 | 59804 (93.74) | 3992 (6.26) | <0.001 |
| 70-74 | 53454 (91.97) | 4669 (8.03) |
| 75-79 | 36311 (89.38) | 4314 (10.62) |
| 80- | 29065 (83.68) | 5670 (16.32) |
| Ethnicity | Han ethnicity | 149061 (90.49) | 15671 (9.51) | 0.034 |
| Others | 29573 (90.86) | 2974 (9.14) |
| Household type | Local | 174423 (90.55) | 18199 (9.45) | 0.389 |
| Intra-city mobility | 1873 (89.75) | 214 (10.25) |
| Intra-provincial mobility | 1081 (90.38) | 115 (9.62) |
| Out-of-province mobility | 1257 (91.48) | 117 (8.52) |
| Region | Eastern | 42142 (90.25) | 4555 (9.75) | <0.001 |
| Central | 60739 (92.04) | 5254 (7.96) |
| Western | 75753 (89.55) | 8836 (10.45) |
| Diagnosis result | Pathogen negative | 46309 (94.08) | 2915 (5.92) | <0.001 |
| Pathogen positive | 126969 (89.27) | 15261 (10.73) |
| No pathogen result | 172 (93.48) | 12 (6.52) |
| Tuberculous pleurisy | 5184 (91.90) | 457 (8.10) |
| Complication | Yes | 33187 (86.68) | 5101 (13.32) | <0.001 |
| No | 54622 (91.97) | 4771 (8.03) |
| Unknown | 90825 (91.19) | 8773 (8.81) |
| 0-month sputum smear result | Positive | 74788 (88.05) | 10151 (11.95) | <0.001 |
| Negative | 103569 (92.44) | 8471 (7.56) |
| No result | 277 (92.33) | 23 (7.67) |
| Discovery mode | Passive | 172804 (90.43) | 18283 (9.57) | <0.001 |
| Active | 5830 (94.15) | 362 (5.85) |
| Treatment type | Initial treatment | 163653 (91.02) | 16141 (8.98) | <0.001 |
| Retreatment treatment | 14981 (85.68) | 2504 (14.32) |
| Treatment mode | Outpatient treatment | 163601 (90.63) | 16915 (9.37) | <0.001 |
| Inpatient | 15033 (89.68) | 1730 (10.32) |
| Treatment plan | 2HRZE/4HR | 126251 (92.60) | 10095 (7.40) | <0.001 |
| 2HRZE/7-10HRE | 14397 (88.30) | 1908 (11.70) |
| 2HRZE/10HRE | 17508 (85.54) | 2959 (14.46) |
| 6-9RZELfx | 440 (89.07) | 54 (10.93) |
| Other sensitive plans | 20038 (84.67) | 3629 (15.33) |
| Fdc usage | Yes | 149524 (91.19) | 14437 (8.81) | <0.001 |
| No | 29110 (87.37) | 4208 (12.63) |
| Medication adherence group | <70% | 285 (7.13) | 3711 (92.87) | <0.001 |
| 70%~79% | 58 (19.59) | 238 (80.41) |
| 80%~89% | 149 (29.33) | 359 (70.67) |
| 90%~99% | 5617 (87.14) | 829 (12.86) |
| 100% | 172525 (92.74) | 13508 (7.26) |
| Visit adherence group | <70% | 402 (12.43) | 2831 (87.57) | <0.001 |
| 70%~79% | 60 (17.65) | 280 (82.35) |
| 80%~89% | 96 (26.02) | 273 (73.98) |
| 90%~99% | 173 (47.79) | 189 (52.21) |
| 100% | 177903 (92.19) | 15072 (7.81) |
| Has first visit | Yes | 177522 (90.63) | 18348 (9.37) | <0.001 |
| No | 1112 (78.92) | 297 (21.08) |
| Has adverse reaction | Yes | 1244 (56.37) | 963 (43.63) | <0.001 |
| No | 177390 (90.94) | 17682 (9.06) |
